# Supplementary material for: Heparin is essential for optimal cell signaling by FGF21 and for regulation of βKlotho cellular stability
Source: PubMed Central journal article supplement — Proc Natl Acad Sci U S A. 2023 Feb 6;120(7):e2219128120. doi: 10.1073/pnas.2219128120 (PMC9962926; doi:10.1073/pnas.2219128120), 2023-02-06
Supplement: pnas.2219128120.sapp.pdf [file pnas.2219128120.sapp.pdf]

**Supporting Information for**

Heparin is essential for optimal cell signaling by FGF21 and for regulation of  $\beta$ Klotho cellular stability

Seong J. An, Jyotidarsini Mohanty, Francisco Tome, Yoshihisa Suzuki, Irit Lax and Joseph Schlessinger

Corresponding authors: Seong J. An, Joseph Schlessinger  
Email: [seong.an@yale.edu](mailto:seong.an@yale.edu), [joseph.schlessinger@yale.edu](mailto:joseph.schlessinger@yale.edu)

**This PDF file includes:**

Figures S1 to S7

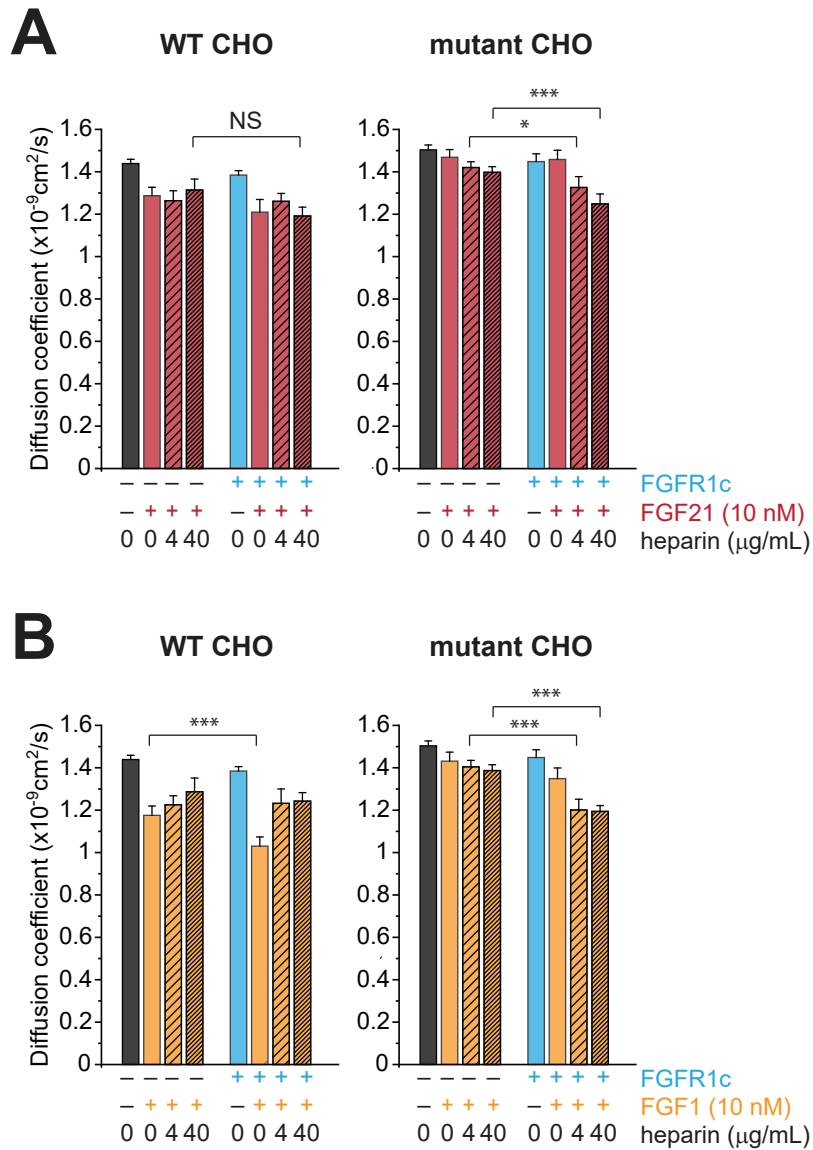

**Figure S1. Diffusion coefficient measurements of HaloTag- $\beta$ Klotho stimulated by FGF21 or FGF1 in WT or HSPG-deficient CHO cells.**

(A) Diffusion coefficients of HaloTag- $\beta$ Klotho particles in WT and mutant (HSPG deficient) CHO cells with or without exogenous FGFR1c under the following FGF21 conditions: no ligands (40 cells each for WT and mutant cells), FGF21 only (9 and 14 cells, respectively), FGF21 and 4  $\mu\text{g/mL}$  heparin (6 and 24 cells, respectively), FGF21 and 40  $\mu\text{g/mL}$  heparin (5 and 26 cells, respectively), FGFR1c only (34 and 41 cells, respectively), FGFR1c and FGF21 (7 and 26 cells, respectively), FGFR1c, FGF21 and 4  $\mu\text{g/mL}$  heparin (8 and 22 cells, respectively) and FGFR1c, FGF21 and 40  $\mu\text{g/mL}$  heparin (7 and 23 cells, respectively). (B) Diffusion coefficients of HaloTag- $\beta$ Klotho particles in WT and HSPG-deficient CHO cells under the following FGF1 conditions: no ligands (40 cells each for WT and mutant cells), FGF1 only (8 and 24 cells, respectively), FGF1 and 4  $\mu\text{g/mL}$  heparin (6 and 23 cells, respectively), FGF1 and 40  $\mu\text{g/mL}$  heparin (8 and 24 cells, respectively), FGFR1c only (34 and 41 cells, respectively), FGFR1c and FGF21 (17 and 13 cells, respectively), FGFR1c, FGF21 and 4  $\mu\text{g/mL}$  heparin (7 and 19 cells, respectively) and FGFR1c, FGF21 and 40  $\mu\text{g/mL}$  heparin (8 and 24 cells, respectively). Error bars indicate mean  $\pm$  SE, \* $P < 0.05$ , \*\*\* $P < 0.001$  by Student's t test. Note that diffusion coefficients with exogenous FGFR1c are redisplayed from Fig. 1 and 3 for comparison.

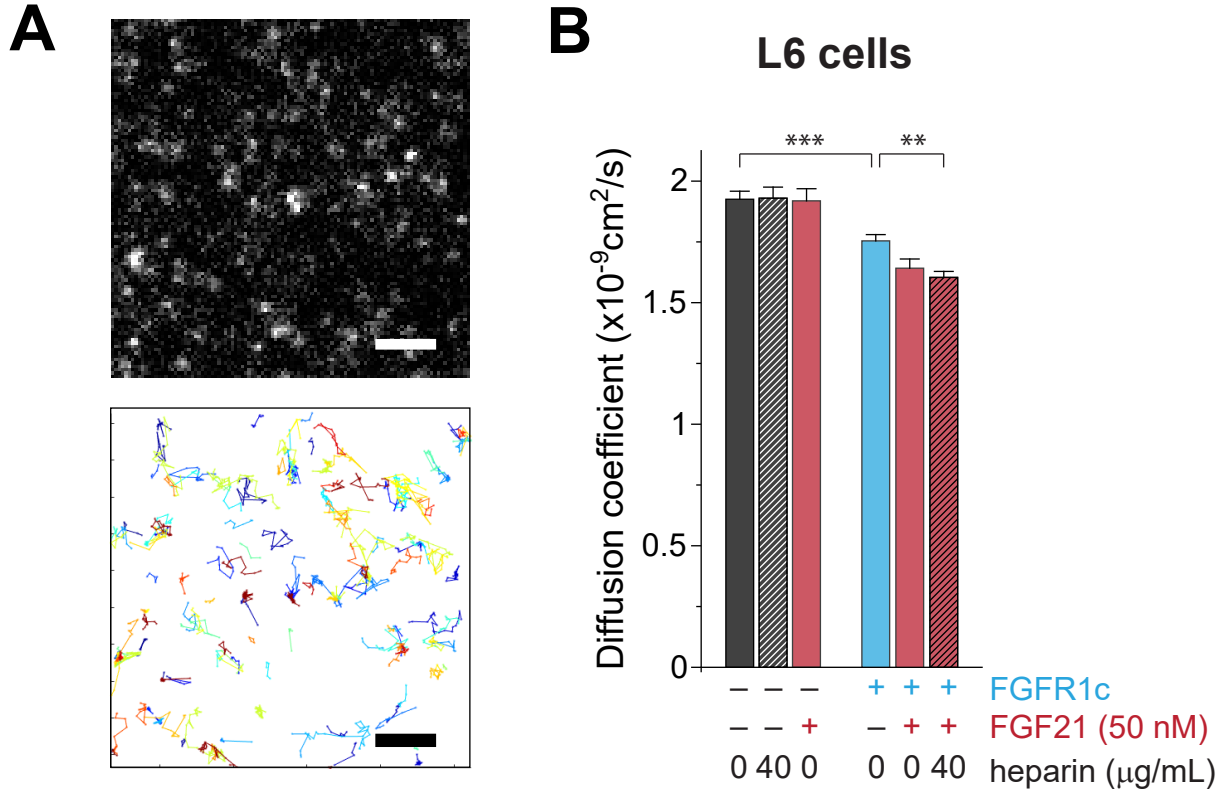

**Figure S2. Diffusion coefficient measurements of HaloTag-βKlotho expressed in L6 cells.**

(A) Expanded view of HaloTag-βKlotho particles on the surface of an L6 cell imaged by TIRFM (upper panel). A selected frame (100-ms exposure) from a 10-Hz recording is shown. Scale bar, 2 μm. Automated detection and tracking of moving HaloTag-βKlotho particles during a 10-s recording period (lower panel). Single-particle tracking was performed as described in Materials and Methods. (B) Diffusion coefficient of HaloTag-βKlotho particles in L6 cells under the following conditions: no ligands (33 cells), 40 μg/mL heparin only (10 cells), FGF21 only (10 cells), FGFR1c only (42 cells), FGFR1c and FGF21 (12 cells) and FGFR1c, FGF21 and 40 μg/mL heparin (15 cells). Error bars indicate mean ± SE, \*\*P < 0.01 and \*\*\*P < 0.001 by Student's t test.

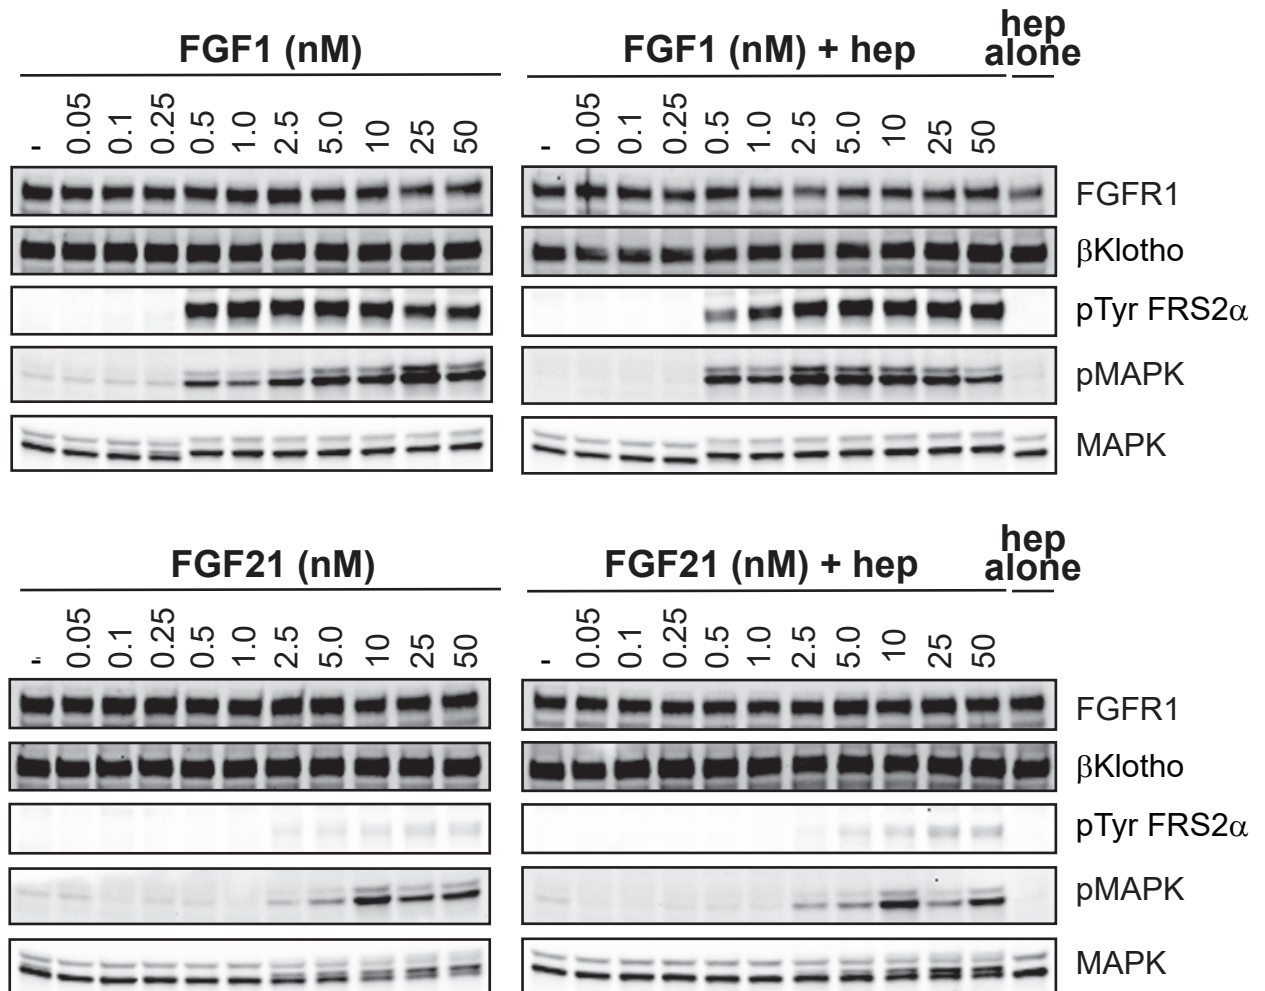

**Figure S3. Cell signaling in WT CHO cells stably expressing FGFR1c together with  $\beta$ Klotho induced by different stimuli.**

Wild-type CHO cells stably expressing FGFR1c together with  $\beta$ Klotho were left unstimulated or stimulated with either FGF1, FGF1 together with heparin (5  $\mu$ g/mL), FGF21, or FGF21 together with heparin (5  $\mu$ g/mL) in increasing concentrations (as indicated) for 10 minutes at 37°C. Cells treated with heparin alone were used as controls. Cell lysates were subjected to SDS/PAGE and analyzed for tyrosine phosphorylation of FRS2 $\alpha$  and MAPK activation by immunoblotting with anti-pFRS2 $\alpha$  and anti-pMAPK antibodies respectively. Anti-FGFR1c, anti-HA and anti-MAPK antibodies were used as loading controls.

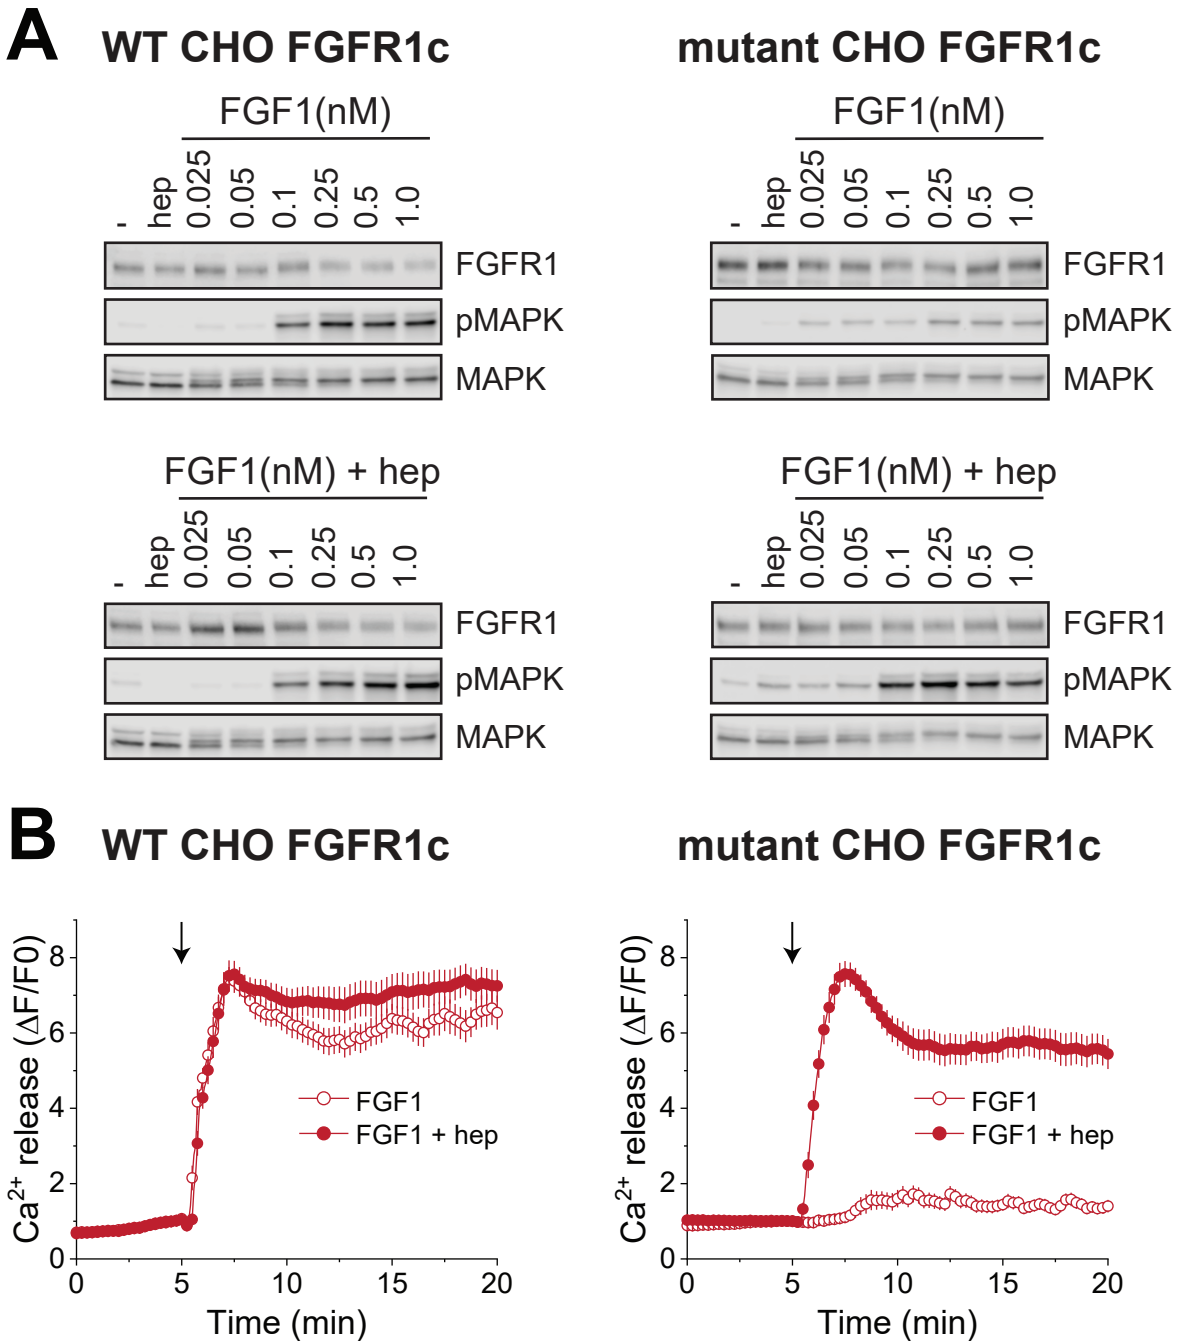

**Figure S4. Cell signaling in WT or HSPG-deficient CHO cells stably expressing FGFR1c induced by different stimuli.**

(A) WT or HSPG deficient CHO cells stably expressing FGFR1c were left unstimulated or stimulated with increasing concentrations of FGF1 (as indicated) in the absence or presence of heparin (5  $\mu\text{g}/\text{mL}$ ) for 10 min and 37°C. Cells treated with heparin alone (5  $\mu\text{g}/\text{mL}$ ) were used as controls. Cell lysates were subjected to SDS-PAGE and analyzed for MAPK activation by immunoblotting with anti-pMAPK. Anti-FGFR and anti-MAPK antibodies were used as controls. (B) WT or HSPG-deficient CHO cells stably expressing FGFR1c were loaded with the fluorescent  $\text{Ca}^{2+}$  indicator Calbryte 520 AM and stimulated with either FGF1 (0.1 nM) alone or FGF1 (0.1 nM) together with heparin (4  $\mu\text{g}/\text{mL}$ ). The change in fluorescence ( $\Delta\text{F}$ ) was normalized to initial fluorescence ( $\text{F}_0$ ) and plotted as a function of time. Arrow indicates when ligands were added. Error bars indicate mean  $\pm$  SE ( $n = 30$  cells for each condition).

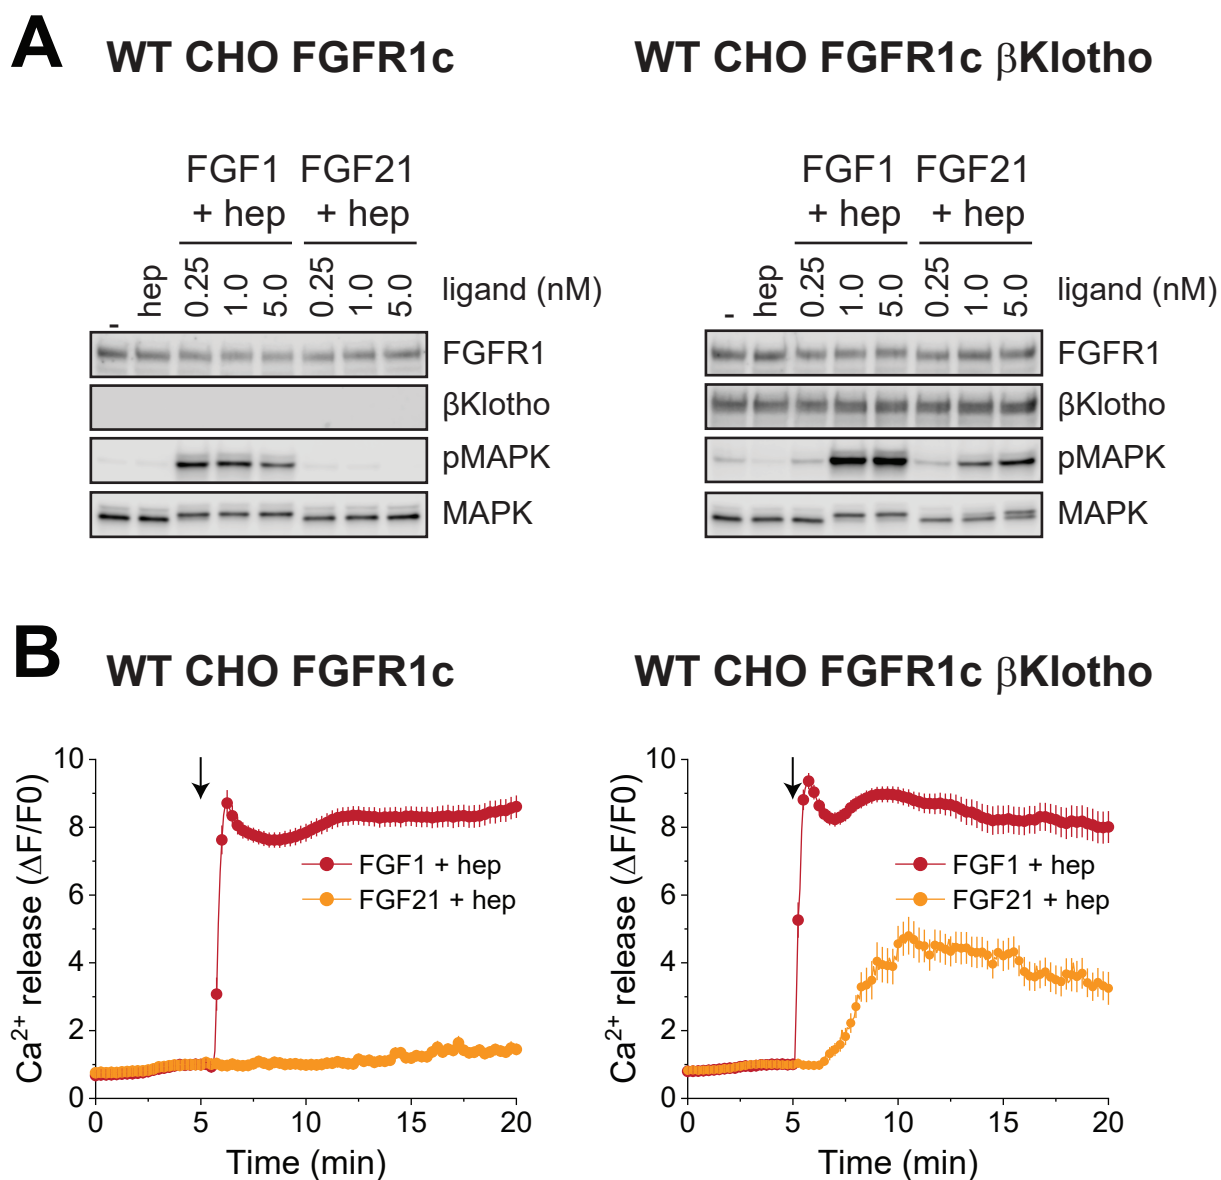

**Figure S5. Cell signaling in WT CHO cells stably expressing FGFR1c alone or FGFR1c with  $\beta$ Klotho induced by different stimuli.**

**(A)** WT CHO cells stably expressing FGFR1c alone or FGFR1c together with  $\beta$ Klotho were left unstimulated or stimulated with increasing concentrations of FGF1 or FGF21 (as indicated) in the presence of heparin (5  $\mu$ g/mL) for 10 min and 37°C. Cells treated with heparin alone (5  $\mu$ g/mL) were used as controls. Cell lysates were subjected to SDS-PAGE and analyzed for MAPK activation by immunoblotting with anti-pMAPK. Anti-FGFR and anti-MAPK antibodies were used as controls. **(B)** WT CHO cells stably expressing FGFR1c alone or FGFR1c together with  $\beta$ Klotho were loaded with the fluorescent  $\text{Ca}^{2+}$  indicator Calbryte 520 AM and stimulated with either FGF1 (5 nM) or FGF21 (5 nM) in the presence of heparin (4  $\mu$ g/mL). The change in fluorescence ( $\Delta F$ ) was normalized to initial fluorescence ( $F_0$ ) and plotted as a function of time. Arrow indicates when ligands were added. Error bars indicate mean  $\pm$  SE ( $n = 30$  cells for each condition).

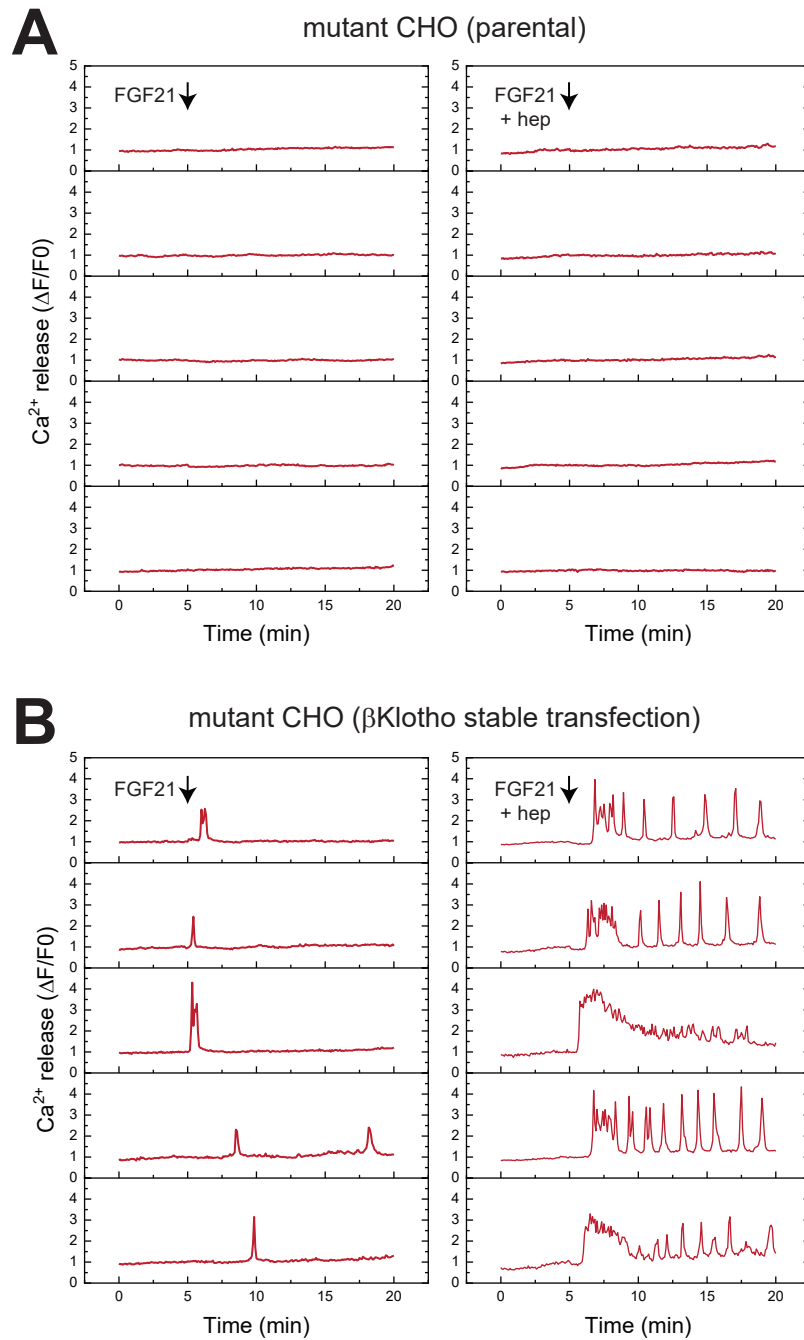

**Figure S6. Calcium release measurements of HSPG-deficient CHO cells in response to different stimuli.**

(**A** and **B**) Parental HSPG-deficient CHO cells (**A**) and HSPG-deficient CHO cells stably expressing  $\beta$ Klotho (**B**) were loaded with the fluorescent Ca<sup>2+</sup> indicator Calbryte 520 AM and stimulated with either FGF21 (50 nM) or FGF21 together with heparin (40  $\mu$ g/mL). The change in fluorescence ( $\Delta F$ ) was normalized to initial fluorescence ( $F_0$ ) and plotted as a function of time. Individual cell recordings are shown to highlight transient or oscillatory nature of Ca<sup>2+</sup> release. Arrow indicates when ligands were added.

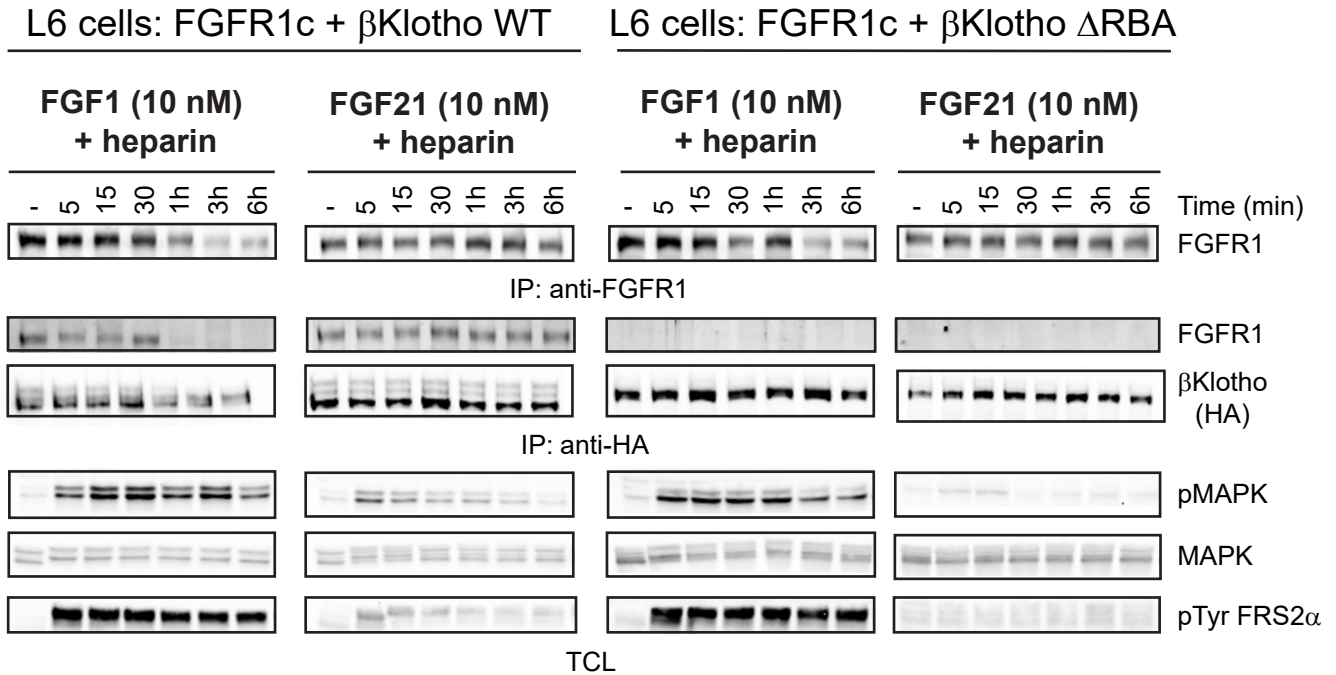

**Figure S7. Cell signaling in L6 cells stably expressing FGFR1c together with  $\beta$ Klotho induced by different stimuli.**

L6 cells stably expressing FGFR1c together with either  $\beta$ Klotho WT or  $\beta$ Klotho  $\Delta$ RBA (both with an HA tag) were left unstimulated or stimulated with FGF1 together with heparin or FGF21 together with heparin for the indicated time points at 37°C. Cell lysates were subjected to immunoprecipitation (IP) with either anti-FGFR1 antibodies or anti-HA antibodies followed by immunoblotting with anti-FGFR1 antibodies or anti-HA antibodies. Cell lysates were also analyzed for MAPK activation and tyrosine phosphorylation of FRS2 $\alpha$  by immunoblotting with antibodies for pMAPK and pFRS2 $\alpha$  respectively. Anti-MAPK antibodies were used as loading control. TCL, total cell lysate.
